# Supplementary material for: Cellular Organelle-Related Transcriptomic Profile Abnormalities in Neuronopathic Types of Mucopolysaccharidosis: A Comparison with Other Neurodegenerative Diseases
Source: MDPI journal article supplement (doi:10.3390/cimb46030169), 2024-03-21
Supplement: s1 [file s1]

**Table S1.** Transcripts with severely impaired expression ( $\log_2FC < -1.5$  or  $> 1.5$ ) in neuronopathic types/subtypes of MPS associated with organelles.

| Structure or<br>organelle | Transcripts with severely impaired expression ( $\log_2FC < -1.5$ or $> 1.5$ ) in specific<br>neuronopathic types/subtypes of MPS associated with organelles |       |        |             |             |             |             |            |
|---------------------------|--------------------------------------------------------------------------------------------------------------------------------------------------------------|-------|--------|-------------|-------------|-------------|-------------|------------|
|                           | Transcript                                                                                                                                                   | MPS I | MPS II | MPS<br>IIIA | MPS<br>IIIB | MPS<br>IIIC | MPS<br>IIID | MPS<br>VII |
| Nucleus                   | <i>ABHD5</i>                                                                                                                                                 | -     | -      | -1.75       | -           | -           | -           | -          |
|                           | <i>BHLHE4</i>                                                                                                                                                | -     | -      | -           | 1.56        | -           | -           | -          |
|                           | <i>CAPN2</i>                                                                                                                                                 | -3.87 | -      | -           | -1.58       | -           | -           | -          |
|                           | <i>CENPU</i>                                                                                                                                                 | -     | -      | -           | -           | -           | -1.99       | -2.2       |
|                           | <i>CSDC2</i>                                                                                                                                                 | -     | -      | -           | -           | -           | 2.29        | 1.76       |
|                           | <i>DNASE1L1</i>                                                                                                                                              | -1.95 | -      | -           | -           | -           | -           | -          |
|                           | <i>FBXO32</i>                                                                                                                                                | -1.96 | -      | -           | -           | -2.21       | -           | -          |
|                           | <i>FOXL2</i>                                                                                                                                                 | -     | -      | -           | -           | -1.73       | -1.93       | -          |
|                           | <i>FYN</i>                                                                                                                                                   | -     | -      | -           | 2.05        | -           | 1.89        | -          |
|                           | <i>HNRNPF</i>                                                                                                                                                | -     | -      | -           | -2.19       | -           | -           | -          |
|                           | <i>HSPA2</i>                                                                                                                                                 | -1.73 | -      | -1.75       | -           | -           | -           | -          |
|                           | <i>HSPB7</i>                                                                                                                                                 | -     | 1.8    | -           | -           | -           | 2.70        | 1.85       |
|                           | <i>HSPB7</i>                                                                                                                                                 | -     | -      | -           | -           | -           | 2.38        | 1.72       |
|                           | <i>HSPB7</i>                                                                                                                                                 | -     | -      | -           | -           | -           | 2.4         | 2.2        |
|                           | <i>IGFBP3</i>                                                                                                                                                | -     | -      | -           | 2.08        | -           | 2.21        | -          |
|                           | <i>IRX1</i>                                                                                                                                                  | -     | -      | -1.74       | -           | -           | -           | -2.82      |
|                           | <i>JUNB</i>                                                                                                                                                  | -     | -      | -           | 1.52        | -           | -           | -          |
|                           | <i>KHNYN</i>                                                                                                                                                 | -     | -      | -           | 1.75        | -           | 1.55        | -          |
|                           | <i>LIMS2</i>                                                                                                                                                 | 2.66  | -      | 2.58        | -           | -           | -           | -          |
|                           | <i>LMCD1</i>                                                                                                                                                 | -     | -      | -2.178      | -           | -           | -           | -2.75      |
|                           | <i>LMO7</i>                                                                                                                                                  | 1.65  | -      | -           | -           | -           | -           | -          |
|                           | <i>MCM4</i>                                                                                                                                                  | -     | -      | -           | -2.14       | -1.69       | -2.72       | -          |
|                           | <i>PDE4DIP</i>                                                                                                                                               | -     | -      | -1.8        | -           | -           | -           | -          |
|                           | <i>PIK3R1</i>                                                                                                                                                | -     | -      | -1.52       | -           | -           | -           | -          |
|                           | <i>PKD1</i>                                                                                                                                                  | -     | -      | -           | -           | 1.67        | -           | -          |
|                           | <i>PPIL1</i>                                                                                                                                                 | -     | -      | -           | -           | -1.73       | -1.64       | -          |
|                           | <i>PSMD2</i>                                                                                                                                                 | -1.57 | -      | -           | -           | -           | -           | -          |
|                           | <i>RPS2</i>                                                                                                                                                  | -     | -      | -           | -           | -           | -           | -          |
|                           | <i>RPS6KA2</i>                                                                                                                                               | -     | -      | 1.59        | -           | -           | -           | -          |
|                           | <i>RPS9</i>                                                                                                                                                  | -     | -1.52  | -           | -           | -           | -           | -1.88      |
|                           | <i>SPOCD1</i>                                                                                                                                                | -     | -      | -           | 1.96        | -           | -           | 2.39       |
|                           | <i>TBX3</i>                                                                                                                                                  | -1.89 | -      | -1.56       | -           | -           | -           | -          |
|                           | <i>UBE2Q2</i>                                                                                                                                                | -2.55 | -1.82  | -2.37       | -           | -           | -           | -          |
|                           | <i>WEE1</i>                                                                                                                                                  | -     | -      | -           | -1.88       | -           | -           | -1.77      |
|                           | <i>ZMIZ2</i>                                                                                                                                                 | -     | -      | 1.66        | -           | -           | -           | -          |
| Endoplasmic<br>reticulum  | <i>ARL6IP6</i>                                                                                                                                               | -1.57 | -2.61  | -1.47       | -2.12       | -2.19       | -           | -1.64      |
|                           | <i>ASPH</i>                                                                                                                                                  | -     | -      | -1.79       | -           | -           | -           | -          |
|                           | <i>CAPN2</i>                                                                                                                                                 | -3.87 | -      | -           | -1.58       | -           | -           | -          |
|                           | <i>CHPT1</i>                                                                                                                                                 | -     | -      | -           | -1.75       | -           | -           | -          |
|                           | <i>COL12A1</i>                                                                                                                                               | -     | -      | 1.53        | -           | 1.91        | -           | -          |
|                           | <i>COL4A2</i>                                                                                                                                                | -     | -      | -2.63       | 2.51        | -           | -           | -          |
|                           | <i>CTDNEP1</i>                                                                                                                                               | -     | -      | -           | -1.73       | -1.74       | -           | -          |
|                           | <i>DNASE1L1</i>                                                                                                                                              | -1.95 | -      | -           | -           | -           | -           | -          |

|                 |                |       |      |       |       |       |       |       |
|-----------------|----------------|-------|------|-------|-------|-------|-------|-------|
|                 | <i>EMC9</i>    | -     | -    | -     | -1.54 | -     | -     | -2.18 |
|                 | <i>FLRT2</i>   | -     | -    | 2.10  | 1.9   | 1.54  | -     | -     |
|                 | <i>FYN</i>     | -     | 2.37 | -     | 2.05  | -     | 1.89  | -     |
|                 | <i>HLA-B</i>   | -     | -    | -     | -     | -     | 2.08  | -     |
|                 | <i>IGFBP3</i>  | -     | -    | -     | 2.08  | -     | 2.21  | -     |
|                 | <i>KDSR</i>    | 2.03  | -    | -     | -     | -     | 1.64  | -     |
|                 | <i>MEGF6</i>   | -     | -    | 1.59  | -     | -     | -     | -     |
|                 | <i>MFGE8</i>   | 3.03  | -    | 5.05  | 2.82  | -     | -     | -     |
|                 | <i>MOXD1</i>   | -     | -    | -2.25 | -     | -     | -     | -2.28 |
|                 | <i>PIK3R1</i>  | -     | -    | -     | -1.52 | -     | -     | -     |
|                 | <i>PKD1</i>    | -     | -    | -     | -     | 1.67  | -     | -     |
|                 | <i>PTGS1</i>   | -     | -    | -2.22 | -2.38 | -     | -     | -4.32 |
|                 | <i>RRAS2</i>   | -     | -    | -     | -     | -     | -     | -1.52 |
|                 | <i>S100A3</i>  | -     | -    | -1.65 | -     | -1.88 | -1.98 | -1.65 |
|                 | <i>SULF1</i>   | 2.04  | -    | 2.80  | -     | -     | -     | -     |
|                 | <i>SULF1</i>   | -     | -    | 2.63  | -     | -     | -     | -     |
|                 | <i>TNC</i>     | -     | -    | -2.25 | -3.85 | -     | -     | -1.63 |
|                 | <i>UCHL1</i>   | -     | -    | -     | 2.42  | -     | -     | -     |
|                 | <i>YIPF5</i>   | -     | -    | -     | -     | -     | -     | -1.71 |
| Golgi apparatus | <i>CAPN2</i>   | -3.87 | -    | -     | -1.58 | -     | -     | -     |
|                 | <i>CHPF</i>    | -     | -    | 1.52  | 1.75  | -     | -     | 1.58  |
|                 | <i>CHPT1</i>   | -     | -    | -     | -1.75 | -     | -     | -     |
|                 | <i>HLA-B</i>   | -     | -    | -     | -     | -     | 2.08  | -     |
|                 | <i>KIF13A</i>  | -     | -    | -     | -1.65 | -     | -     | -1.54 |
|                 | <i>MAPKAP1</i> | -     | -    | -     | 1.65  | -     | -     | -     |
|                 | <i>MME</i>     | -2.61 | -    | -     | -     | -     | -3.62 | -     |
|                 | <i>PDE4DIP</i> | -     | -    | -1.8  | -     | -     | -     | -     |
|                 | <i>PIK3R1</i>  | -     | -    | -     | -1.52 | -     | -     | -     |
|                 | <i>PKD1</i>    | -     | -    | -     | -     | 1.67  | -     | -     |
|                 | <i>PTGS1</i>   | -     | -    | -2.22 | -2.38 | -     | -     | -4.32 |
|                 | <i>RFNG</i>    | -     | -    | 1.74  | -     | -     | -     | -     |
|                 | <i>RRAS2</i>   | -     | -    | -     | -     | -     | -     | -1.52 |
|                 | <i>S100A3</i>  | -     | -    | -1.65 | -     | -1.88 | -1.98 | -1.65 |
|                 | <i>SLC35E4</i> | -     | -    | -     | -     | -     | -     | 1.58  |
|                 | <i>SULF1</i>   | 2.04  | 2.80 | -     | -     | -     | -     | -     |
|                 | <i>SULF1</i>   | -     | 2.63 | -     | -     | -     | 1.85  | 1.62  |
|                 | <i>YIPF5</i>   | -     | -    | -     | -     | -     | -     | -1.71 |
| Mitochondrion   | <i>ABHD5</i>   | -     | -    | -1.75 | -     | -     | -     | -     |
|                 | <i>CAPN2</i>   | -3.87 | -    | -     | -1.58 | -     | -     | -     |
|                 | <i>CHPF</i>    | -     | -    | 1.52  | 1.76  | -     | -     | 1.58  |
|                 | <i>FYN</i>     | -     | 2.37 | -     | 2.05  | -     | 1.89  | -     |
|                 | <i>MRPS24</i>  | -1.84 | -    | -1.85 | -     | -     | -     | -     |
|                 | <i>SLC22A4</i> | -1.83 | -    | -     | -     | -     | -     | -     |
| Cytoskeleton    | <i>ACTC1</i>   | -     | -    | 1.74  | -     | -     | -     | 3.15  |
|                 | <i>CAPN2</i>   | -3.87 | -    | -     | -1.58 | -     | -     | -     |
|                 | <i>CLDN11</i>  | -     | -    | -2.43 | -     | -1.64 | -     | -1.91 |
|                 | <i>FYN</i>     | -     | 2.37 | -     | 2.05  | -     | 1.89  | -     |
|                 | <i>HSPA2</i>   | -1.73 | -    | -1.75 | -     | -     | -     | -     |
|                 | <i>HSPB7</i>   | -     | 1.8  | -     | -     | -     | 2.70  | 1.85  |

|          |                |       |       |       |       |      |       |       |
|----------|----------------|-------|-------|-------|-------|------|-------|-------|
| Lysosome | <i>HSPB7</i>   | -     | -     | -     | -     | -    | 2.38  | 1.72  |
|          | <i>HSPB7</i>   | -     | -     | -     | -     | -    | 2.4   | 2.2   |
|          | <i>KIF13A</i>  | -     | -     | -     | -     | -    | -     | -1.54 |
|          | <i>RPS6KA2</i> | -     | -     | 1.59  | -     | -    | -     | -     |
|          | <i>PDE4DIP</i> | -     | -     | -1.8  | -     | -    | -     | -     |
|          | <i>CAPN2</i>   | -3.87 | -1.36 | -     | -1.58 | -    | -     | -     |
|          | <i>DRAM1</i>   | -     | -     | -     | -2.41 | -    | -     | -2.4  |
|          | <i>SLC7A5</i>  | -     | -     | 1.82  | -     | 1.73 | -     | -     |
|          | <i>MRPS24</i>  | -1.84 | -     | -1.85 | -     | -    | -     | -     |
|          | <i>RPL10</i>   | -1.89 | -     | -     | -     | -    | -4.61 | -     |
| Ribosome | <i>RPL10</i>   | -     | -     | -     | -     | -    | -1.62 | -1.94 |
|          | <i>RPLP2</i>   | -1.66 | -     | -     | -1.72 | -    | -     | -     |
|          | <i>RPLP2</i>   | 3.80  | -     | -     | 3.81  | -    | -     | -     |
|          | <i>RPS2</i>    | -     | -     | -     | -     | -    | -     | -1.55 |
|          | <i>RPS4X</i>   | -     | -     | -     | -     | -    | -1.53 | -     |
|          | <i>RPS9</i>    | -     | -     | -     | -     | -    | -1.55 | -1.56 |
